CORRECTION

# Correction: Spatial Assortment of Mixed Propagules Explains the Acceleration of Range Expansion

Andriamihaja Ramanantoanina, Aziz Ouhinou, Cang Hui

In the Results section, there is an error in the fourth equation in the section titled “Propagule with two dispersal abilities” and in the eleventh equation in the section titled “Propagules with multiple dispersal abilities.” In both equations,  $\gamma_2$  appears incorrectly outside the parentheses. Please view the complete, correct equations here:

$$c \approx \sqrt{2\ln(R)d_2^2} \left( 1 + \frac{\ln(R)}{12} \gamma_2 \right), \quad (4)$$

$$c = \min_{\lambda} \frac{1}{\lambda} \ln(RM(d_n), \lambda) \approx \sqrt{2\ln(R)d_n^2} \left( 1 + \frac{\ln(R)}{12} \gamma_2 \right), \quad (11)$$

## Reference

1. Ramanantoanina A, Ouhinou A, Hui C (2014) Spatial Assortment of Mixed Propagules Explains the Acceleration of Range Expansion. PLoS ONE 9(8): e103409. doi:[10.1371/journal.pone.0103409](https://doi.org/10.1371/journal.pone.0103409) PMID: [25105414](https://pubmed.ncbi.nlm.nih.gov/25105414/)

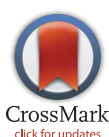

## OPEN ACCESS

**Citation:** Ramanantoanina A, Ouhinou A, Hui C (2015) Correction: Spatial Assortment of Mixed Propagules Explains the Acceleration of Range Expansion. PLoS ONE 10(8): e0136479. doi:[10.1371/journal.pone.0136479](https://doi.org/10.1371/journal.pone.0136479)

**Published:** August 19, 2015

**Copyright:** © 2015 Ramanantoanina et al. This is an open access article distributed under the terms of the [Creative Commons Attribution License](https://creativecommons.org/licenses/by/4.0/), which permits unrestricted use, distribution, and reproduction in any medium, provided the original author and source are credited.
